# Supplementary material
Source: PubMed Central journal article supplement (PMC4256864)
Supplement: supp_pp.114.250811_250811suppfig1.pdf [file supp_pp.114.250811_250811suppfig1.pdf]

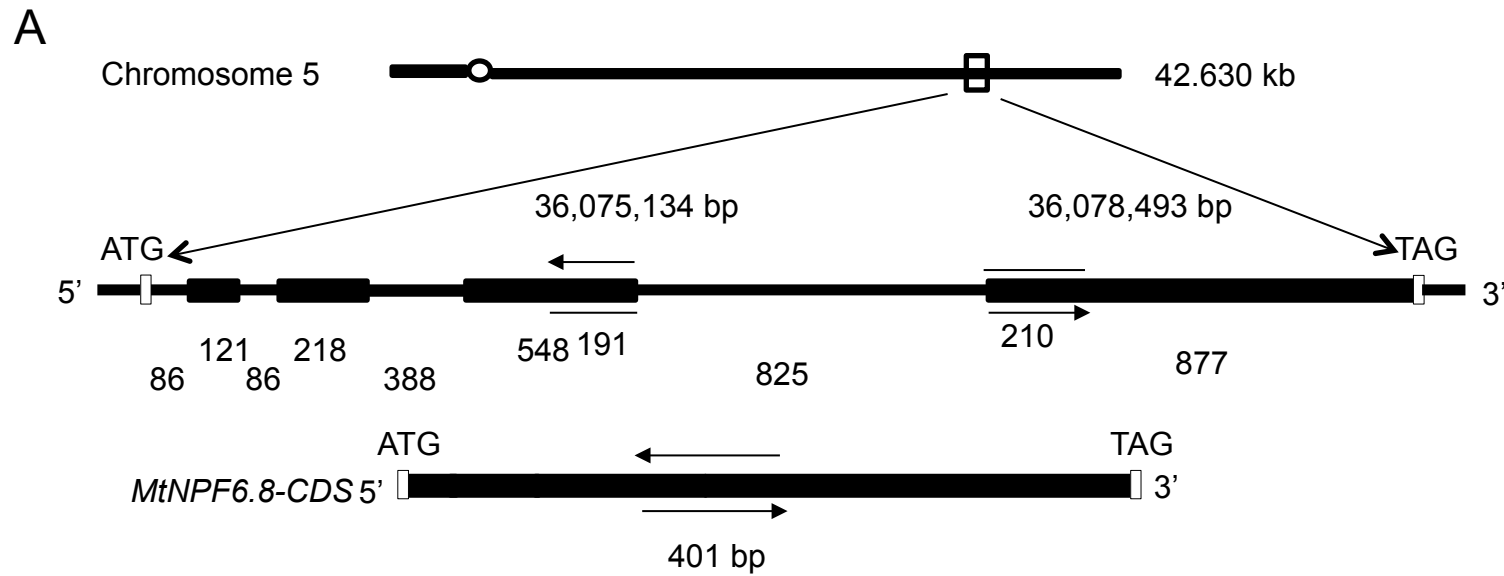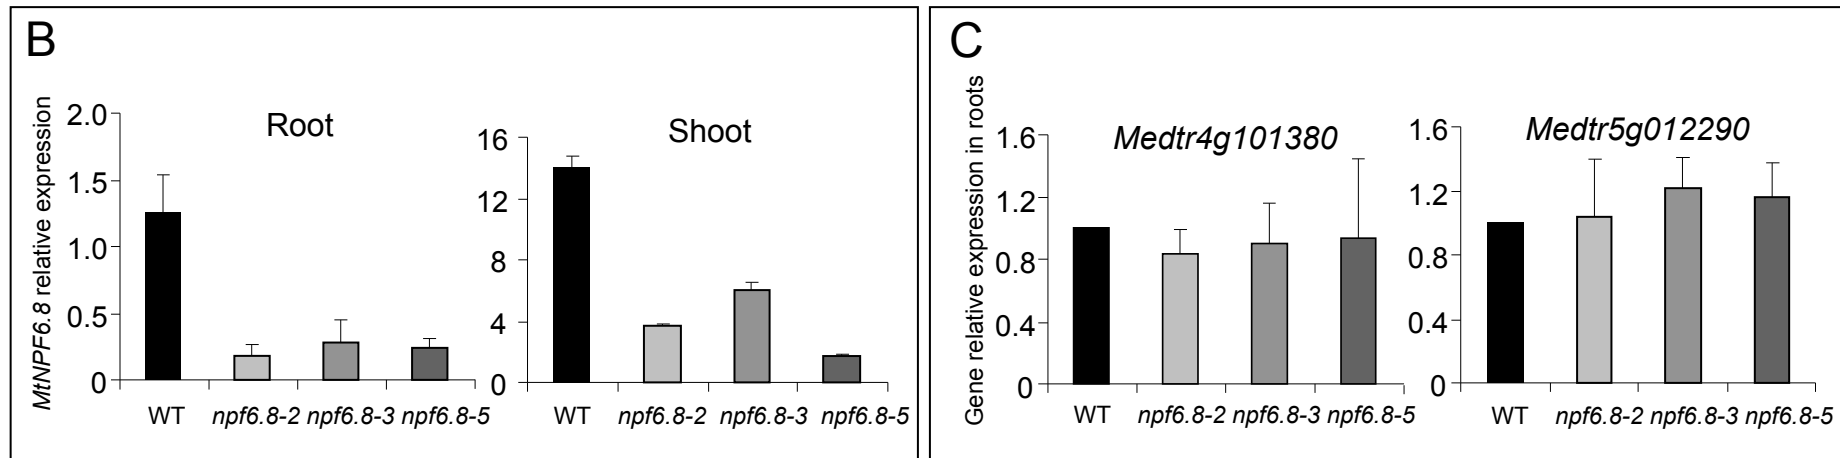

**Supplemental Figure S1:** Characterization of *npf6.8* knockdown lines. (A) Schematic *MtNPF6.8* gene structure. Closed boxes represent exons containing coding regions, open boxes represent the start and the stop codons, black darts represent RNAi fragment, and numbers indicate fragment size. (B) Gene expression of *MtNPF6.8* and (C) of two putative nitrate transporter, *Medtr4g101380* and *Medtr5g012290*, determined by quantitative-RT-PCR. Each value represents the mean  $\pm$  SD of three independent biological experiments.
