# Supplementary material
Source: PubMed Central journal article supplement (PMC4256864)
Supplement: supp_pp.114.250811_250811suppfig2.pdf [file supp_pp.114.250811_250811suppfig2.pdf]

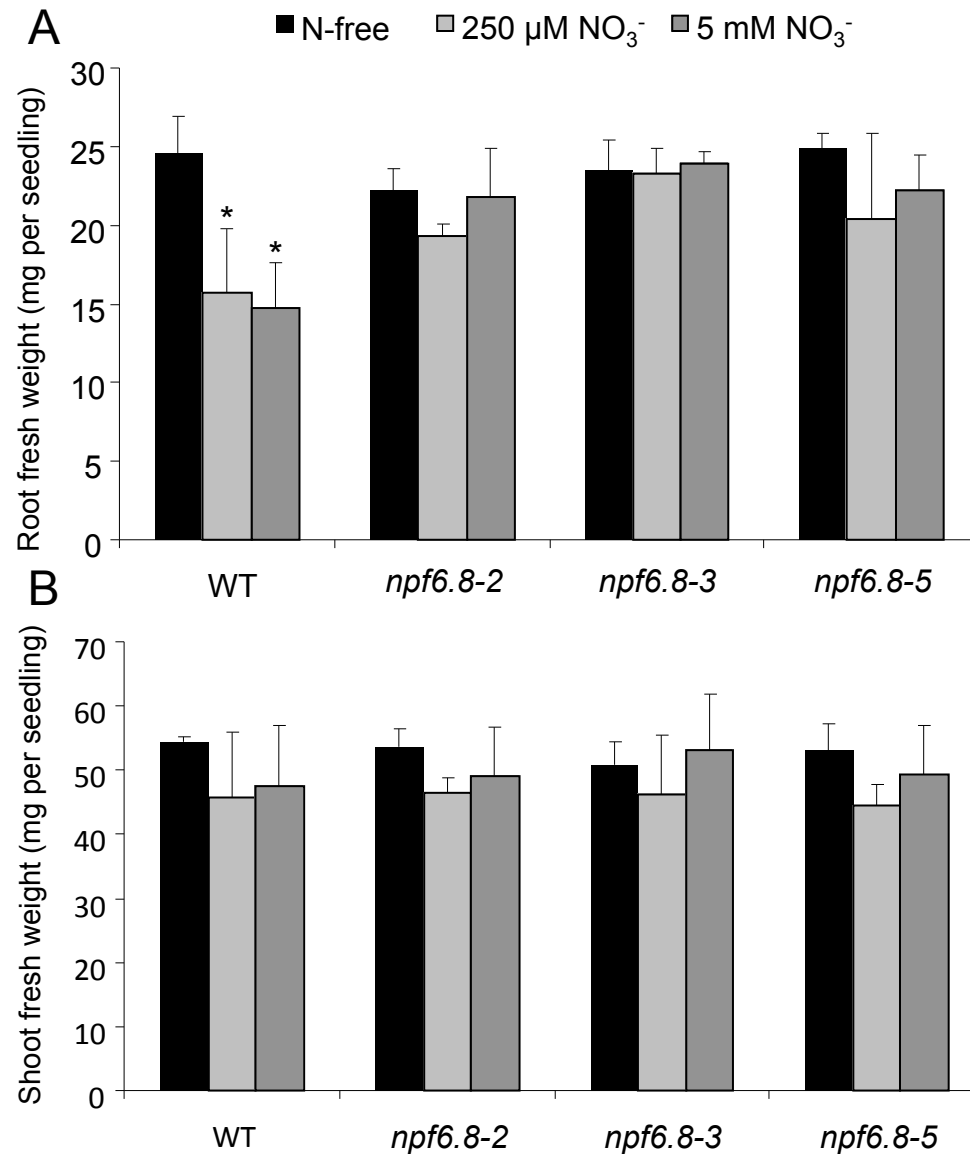

**Supplemental Figure S2:** Effect of nitrate treatment on fresh weight seedlings in wild type (WT) or *npf6.8* knockdown lines. Seedlings were germinated and grown as described in the legend of figure 5. Fresh weight was measured on root (A) and shoot (B) seedlings. Each value represents the mean  $\pm$  SE of three independent experiments of 8 seedlings. Asterisks indicate significant differences compared with the untreated control (N-free) according to a one-way ANOVA test (\*  $P < 0.05$ ).
