# Supplementary material
Source: PubMed Central journal article supplement (PMC4256864)
Supplement: supp_pp.114.250811_250811Supplemental_table_SI.pdf [file supp_pp.114.250811_250811Supplemental_table_SI.pdf]

**Supplemental table SI:** Sequences of primers used for PCR. Fwd: forward primer and Rev: reverse primer.

| Primers used for real-time RT-PCR                           |                                                                    |
|-------------------------------------------------------------|--------------------------------------------------------------------|
| <i>MtNPF6.8</i>                                             | Fwd: CAGGTCCCTTGACAAAGCAGCAATC<br>Rev: GCATGTTGACCAAATGGGAAGGAG    |
| <i>MtUbiquitin10</i>                                        | Fwd: AAGCAGCAACTTCCCTGAAA<br>Rev: GTATGGGTCCGGAATCCAAAC            |
| <i>MtRBP1</i>                                               | Fwd: AGGGGCAAGTTCCTTCATTT<br>Rev: GGTAGAAGTGCTGGCTCAGG             |
| <i>MtCyclinA2</i>                                           | Fwd: CCTTCCTTCTATGATTGCTGCAT<br>Rev: CATGGGTGGCTTGACTGATCT         |
| <i>MtCyclinB1.1</i>                                         | Fwd: TGGCTTCTAGAGCTGTCATTGC<br>Rev: CAACCCCATATTCTTCTGCTT          |
| <i>MtCyclinB1.2</i>                                         | Fwd: CACTATGGCTTTGCCCAATCA<br>Rev: GGCCGCTCGACAAGCTT               |
| <i>MtAurora</i>                                             | Fwd: TGGGTGGTCAGTGCACACAT<br>Rev: AATCCAGTGTGCCGCCACT              |
| <i>18S rDNA</i>                                             | Fwd: GAAACGGCTACCACATCCAAG<br>Rev: AGCCCGGTATTGTTATTTATTGTC        |
| <i>MtNPF6.8-RNAi</i>                                        | Fwd: TCTTTGCAGCACTTTATACAATAGCTT<br>Rev: TGTGTCAAATTGATCAGATCCAAAT |
| <i>Medtr4g101380</i>                                        | Fwd: CTTTGA CT CAGATTGCAGTGGTTT<br>Rev: CAACGAGGAATCATATGGCAGTT    |
| <i>Medtr5g012290</i>                                        | Fwd: GTGACCGGTCCAAATAAACCATGG<br>Rev: ACCCCTATGCATGGAATGTAGAGGC    |
| <i>MtNR1</i>                                                | Fwd: TGGCCCCCATCAAGGAA<br>Rev: CACGCGGGTTTAAAGCTACAC               |
| <i>MtNR2</i>                                                | Fwd: TTCCATTGGCTGGTGAGGAT<br>Rev: GGTTGCACAGCAAATTGAATCA           |
| <i>MtGS2</i>                                                | Fwd: GTTATTGGTTATGAGATGAATGCACAT<br>Rev: TGCAACTCTGTCCATACCATATGC  |
| Primers used to obtain stable <i>npf6.8</i> knockdown lines |                                                                    |
| <i>MtNPF6.8-fragment</i>                                    | Fwd: TTGGTAGCAGTTGGTATTTTGC<br>Rev: TTTCTGTTCATGAATGTAGCTTGC       |
| <i>MtNPF6.8-specific</i>                                    | Fwd: CATCTTTTTTGGTCAATTTGCAGGT<br>Rev: ATATCATGCGATCATAGGCGTCTCG   |
| Primers used to obtain 35S:NPF6.8:GFP/RFP construction      |                                                                    |
| <i>MtNPF6.8-ORF</i>                                         | Fwd: CACCATGGTTCCTTGTGCAAGCAAT<br>Rev: TACTTCTTCCTTCCCATCAAT       |
| Primers used to obtain <i>pMtNPF6.8:GUS</i> construction    |                                                                    |
| <i>pMtNPF6.8</i>                                            | Fwd: CACCCACATTACCCACACCTCAC<br>Rev: TGCTGCTAGCCATCCTCC            |
